# Supplementary material for: The Essential Role of OmpR in Acidithiobacillus caldus Adapting to the High Osmolarity and Its Regulation on the Tetrathionate-Metabolic Pathway
Source: MDPI journal article supplement (doi:10.3390/microorganisms11010035), 2022-12-22
Supplement: s1 [file s1]

# The Essential Role of OmpR in *Acidithiobacillus caldus* Adapting to the High Osmolarity and Its Regulation on the Tetrathionate-Metabolic Pathway

Linxu Chen <sup>\*,†</sup>, Xiao Liu <sup>†</sup>, Chang Gao, Yanan Guan, Jianqiang Lin, Xiangmei Liu and Xin Pang <sup>\*</sup>

State Key Laboratory of Microbial Technology, Shandong University, Qingdao 266237, China

\* Correspondence: [linxuchen@sdu.edu.cn](mailto:linxuchen@sdu.edu.cn) (L.C.); [pangxin@sdu.edu.cn](mailto:pangxin@sdu.edu.cn) (X.P.)

† These authors contributed equally to this work.

**Table S1. Primers used for RT-qPCR.**

| Annotation in genome of <i>A.caldus</i> MTH-04 |   | Primer Sequence (5'→3') |
|------------------------------------------------|---|-------------------------|
| F0726_00045                                    | F | GGGCAGATTATGGGAGA       |
|                                                | R | CGTCAATTCCGAACCA        |
| F0726_00048                                    | F | ATCGTTATCGGCACCTCAG     |
|                                                | R | CAAGGCAACACCGTAGACC     |
| F0726_00105                                    | F | ACGCTACAAAGGGACCAA      |
|                                                | R | GAGCCCGAAGCATTACC       |
| F0726_00222                                    | F | GCACTGACCTTAGCCATTATCTC |
|                                                | R | TCATGCCGCATCCTCGTA      |
| F0726_00324                                    | F | GCAGCATCCTGGGTCTTCA     |
|                                                | R | GACCAAAGTGTCTGCCACTGAT  |
| F0726_00426                                    | F | GGGGATCGTCTCACGCTAT     |
|                                                | R | GCAGGATGATGCCAAACTC     |
| F0726_00650                                    | F | TCAGTGAGAACTTTGGGAGG    |
|                                                | R | ATGGGTTCACAATCTTCG      |
| F0726_00801                                    | F | TTCACCTTGCCCGAAGAGAC    |
|                                                | R | ACCGCTACGTGGATGTGTTT    |
| F0726_01023                                    | F | CGATGTCTTCGGTGGTCAGG    |
|                                                | R | TGATGGCTTGCTGTTGTTCC    |
| F0726_01027                                    | F | CCAAAGGCAAGGATAAGG      |
|                                                | R | CGAACCATTGAGACACCC      |
| F0726_01192                                    | F | CCTCGTGGACAGGCAACTCA    |
|                                                | R | CCGCAAACGCCAGAAGGT      |
| F0726_01551                                    | F | GGTACTTGCCGTTCTCGG      |
|                                                | R | CATGGCGGTGGTCATCTT      |
| F0726_01733                                    | F | AGTTCCAGGACTTGCTGTTTGT  |
|                                                | R | CGAGGTAATCGGTGGTAAAGG   |
| F0726_01734                                    | F | TACACCAATACCGCCTCC      |
|                                                | R | CAACATCGCCGTTAGAAG      |
| F0726_01798                                    | F | TCTGCGGGTGGTAATAGGA     |
|                                                | R | GGCATAAGCCGGACAAAA      |

|             |   |                          |
|-------------|---|--------------------------|
| F0726_01813 | F | GTTGGATTTCCGTGGGTG       |
|             | R | GTGTTGGTTGCGACTGCT       |
| F0726_01814 | F | ATGAACGACCGTAACCGTAT     |
|             | R | GATCTTCTGACAGACCCCTTT    |
| F0726_02203 | F | CGTCGAGGTCAATCATTTAGG    |
|             | R | GCCCACTTATTTCGGCACA      |
| F0726_02272 | F | CATCGCCCATAACTTGC        |
|             | R | CTACCGTTGAAACCTGCT       |
| F0726_01900 | F | GCAACTCGTAGACCCGTCCTT    |
|             | R | CGTGTCCACTATCGGCAGAAAT   |
| F0726_02316 | F | GCGTTGCGGCATTTC          |
|             | R | GTCACCGAGGCTGGATT        |
| F0726_02322 | F | GACAGTTTACCGTTGTTGA      |
|             | R | CGCAGTGAAGCCCTAT         |
| F0726_02335 | F | TCCGTGCCTCGCAAATC        |
|             | R | GCCACCGTCAGAAACACTATC    |
| F0726_02394 | F | CAACCCACCCGACATTCT       |
|             | R | ACGGCGCACCAACAGA         |
| F0726_02436 | F | GCTCAACACCTATCCCTTATTTGC |
|             | R | CTTCATGCGGCTATCCACC      |
| F0726_02439 | F | TTACAACCTGCTTTCGCTCCT    |
|             | R | CGTTTCCGCCTGCCATT        |
| F0726_02465 | F | GAGGAGACCGTCCATGTCA      |
|             | R | TGCGGGTGCAGCAGATA        |
| F0726_02500 | F | GTCAGCCAGATAGATAGTCCAA   |
|             | R | TCCCAGAGCACGACACC        |
| F0726_02503 | F | ATGTTTCGCATCCCAGTAA      |
|             | R | GGAAGTCGCCCAAATAG        |
| F0726_02504 | F | CCCAACTTCATTCCCACC       |
|             | R | CGCTACCTGTATAGTCTCCTCC   |
| F0726_02628 | F | AGGATTTCAGCGTCTGTGGC     |
|             | R | TTCGGGCTCGAAGGGTTT       |
| F0726_02726 | F | CGGTCTAACCCTGCTCAT       |
|             | R | CGACATCGCCATAGTTCA       |
| F0726_02814 | F | AGGACGAGCAGGAATATCGG     |
|             | R | TGTAGGTGTTGGGCAATGAA     |
| F0726_01869 | F | CGAGGGCAAGAAGGAGGT       |
|             | R | TGACGGGTTTGTGGGTAAAT     |
| F0726_03003 | F | AGATAGCGGGATACAATG       |
|             | R | GGCGTAATCGCAACAC         |
| F0726_02641 | F | ACGTCTCCATCGTCGATCTCA    |
|             | R | AGGGCTTGTCGTTGTAGGCA     |

---

**Table S2. Differentially expressed genes detected by RNA-seq and RT-qPCR.**

| Gene ID<br>(F0726_) | Gene          | Annotation                                                 | RNA-seq | RT-qPCR    |
|---------------------|---------------|------------------------------------------------------------|---------|------------|
| 01027               | <i>tetH</i>   | tetrathionate hydrolase                                    | 2.26    | 3.78±0.02  |
| 01028               | <i>tqo</i>    | thiosulfate:quinol oxidase                                 | 1.74    |            |
| 02556               | <i>soxY</i>   | sulfur covalently binding protein                          | 0.62    |            |
| 02557               | <i>soxZ</i>   | sulfur compound chelating protein                          | 0.57    |            |
| 02558               | <i>soxB</i>   | sulfate thiol esterase                                     | 0.56    |            |
| 02562               | <i>soxA</i>   | cytochrome c (diheme)                                      | 0.58    |            |
| 00801               | <i>sdo</i>    | sulfur dioxygenase                                         | 0.62    | 0.59±0.01  |
| 00103               | <i>narJ</i>   | nitrate reductase chaperone                                | 0.51    |            |
| 00104               | <i>narH</i>   | nitrate reductase, beta subunit                            | 0.47    |            |
| 00105               | <i>narG</i>   | nitrate reductase, alpha subunit                           | 0.64    | 0.61±0.01  |
| 00100               | <i>narK</i>   | nitrate/nitrite transporter                                | 0.58    |            |
| 01243               |               | alcohol dehydrogenase                                      | 0.63    |            |
| 00053               | <i>bcsA</i>   | cellulose synthase, subunit A                              | 0.37    |            |
| 02707               |               | gamma-glutamyl kinase                                      | 0.28    |            |
| 02923               |               | sucrose-phosphate synthase                                 | 0.61    |            |
| 02503               |               | peptidase C39 family,                                      | 0.34    | 0.32±0.02  |
| 02504               |               | hypothetical protein                                       | 0.41    | 0.33±0.01  |
| 02505               |               | hypothetical protein                                       | 0.25    |            |
| 02506               |               | hypothetical protein                                       | 0.20    |            |
| 02507               |               | glycosyl transferase                                       | 0.16    |            |
| 00669               | <i>plsX</i>   | glycerol-3-phosphate acyltransferase                       | 1.61    |            |
| 00877               |               | diacylglycerol kinase                                      | 2.82    |            |
| 02669               |               | methyltransferase                                          | 2.05    |            |
| 01008               | <i>glcE</i>   | glycolate oxidase FAD binding subunit                      | 2.01    |            |
| 01009               | <i>glcD</i>   | glycolate oxidase, dehydrogenase subunit                   | 1.97    |            |
| 01010               |               | sugar-binding, N-terminal domain                           | 2.01    |            |
| 01011               |               | Transketolase, N-terminal subunit                          | 2.01    |            |
| 00048               | <i>dsbD</i>   | thiol:disulfide interchange protein                        | 16.25   | 24.92±0.06 |
| 01083               | <i>dsbG</i>   | thiol:disulfide interchange protein                        | 0.57    |            |
| 01826               |               | cytochrome c biogenesis protein                            | 5.66    |            |
| 01597               | <i>hmp</i>    | flavoheмоprotein                                           | 0.42    |            |
| 03003               |               | TonB-dependent receptor                                    | 0.29    | 0.12±0.02  |
| 00324               | <i>znuC</i>   | ABC-type Mn2+/Zn2+ transport system, ATPase component      | 0.46    | 0.57±0.01  |
| 00325               | <i>znuB-1</i> | ABC-type Mn2+/Zn2+ transport system, permease component    | 0.41    |            |
| 00326               | <i>znuB-2</i> | ABC-type Mn2+/Zn2+ transport system, permease component    | 0.47    |            |
| 02726               | <i>mscS</i>   | mechanosensitive ion channel protein                       | 0.64    | 0.61±0.01  |
| 02727               |               | lysogenization protein                                     | 0.24    |            |
| 01013               |               | permease, major facilitator superfamily                    | 1.97    |            |
| 01023               | <i>nodT</i>   | RND efflux system, outer membrane lipoprotein, NodT family | 3.45    | 2.96±0.03  |

|       |             |                                                                         |       |           |
|-------|-------------|-------------------------------------------------------------------------|-------|-----------|
| 01798 |             | membrane protein                                                        | 0.09  | 0.07±0.02 |
| 01812 |             | conserved hypothetical protein                                          | 2.78  |           |
| 01813 |             | conserved hypothetical protein                                          | 2.37  | 3.53±0.04 |
| 01814 |             | hypothetical protein                                                    | 7.31  | 9.11±0.06 |
| 01815 |             | transmembrane protein                                                   | 8.37  |           |
| 01816 |             | conserved hypothetical protein                                          | 8.56  |           |
| 01552 |             | membrane protein                                                        | 0.15  |           |
| 00169 | <i>qseC</i> | two-component sensor histidine kinase                                   | 0.63  |           |
| 00914 | <i>rpoE</i> | RNA polymerase ECF-type sigma factor                                    | 0.52  |           |
| 01192 |             | translation initiation factor IF-2                                      | 0.56  | 0.41±0.01 |
| 02418 | <i>abrB</i> | AbrB family transcriptional regulator                                   | 0.61  |           |
| 02419 |             | PIN domain nuclease                                                     | 0.56  |           |
| 02420 |             | WGR domain protein                                                      | 0.44  |           |
| 02465 |             | hypothetical protein                                                    | 0.00  | 0.00±0.02 |
| 02466 |             | transcriptional regulator, ArsR family                                  | 0.00  |           |
| 02627 | <i>envZ</i> | osmolarity sensor histidine kinase                                      | 2.80  |           |
| 02628 | <i>ompR</i> | osmolarity response regulator                                           | 0.00  | 0.00±0.02 |
| 02199 |             | hypothetical protein                                                    | 0.01  |           |
| 02200 |             | hypothetical protein                                                    | 0.00  |           |
| 02201 | <i>trbI</i> | conjugal transfer protein                                               | 0.00  |           |
| 02202 | <i>trbG</i> | conjugal transfer protein                                               | 0.00  |           |
| 02203 | <i>trbF</i> | conjugal transfer protein                                               | 0.00  | 0.01±0.02 |
| 02389 | <i>traA</i> | Ti-type conjugative transfer relaxase                                   | 0.20  |           |
| 02390 |             | hypothetical protein                                                    | 0.12  |           |
| 01512 | <i>fliQ</i> | flagellar biosynthetic protein                                          | 0.13  |           |
| 00039 | <i>pilZ</i> | pilus biosynthesis protein                                              | 12.81 |           |
| 02316 | <i>motA</i> | flagellar motor protein                                                 | 0.28  | 0.32±0.01 |
| 02317 | <i>exbD</i> | biopolymer transporter                                                  | 0.35  |           |
| 01732 |             | type I restriction-modification system, specificity subunit S           | 0.09  |           |
| 01733 |             | type I restriction-modification system, DNA-methyltransferase subunit M | 0.34  | 0.41±0.01 |
| 01734 |             | hypothetical protein                                                    | 0.07  | 0.18±0.03 |
| 00082 |             | Type I site-specific restriction-modification system, R subunit         | 1.61  |           |
| 02436 |             | type II DNA modification enzyme                                         | 1.82  | 1.41±0.02 |
| 02298 | <i>csf2</i> | CRISPR type IV/AFERR-associated protein                                 | 0.48  |           |
| 02372 | <i>cmk</i>  | cytidylate kinase                                                       | 0.63  |           |
| 02425 |             | histone-like DNA-binding protein                                        | 0.01  |           |
| 02320 | <i>fcy</i>  | purine-cytosine permease                                                | 0.27  |           |
| 02322 | <i>ade</i>  | adenine deaminase                                                       | 0.32  | 0.37±0.01 |
| 01246 |             | ribosomal protein L25                                                   | 1.62  |           |
| 02439 |             | helicase domain protein                                                 | 4.17  | 5.12±0.02 |
| 02394 |             | DEAD/DEAH box helicase domain protein                                   | 4.35  | 5.06±0.04 |
| 00646 |             | DNA polymerase III subunit epsilon                                      | 0.60  |           |

|       |             |                                              |       |            |
|-------|-------------|----------------------------------------------|-------|------------|
| 00647 |             | protein of unknown function DUF2237          | 0.61  |            |
| 00650 |             | hypothetical protein                         | 0.63  | 0.60±0.02  |
| 01900 |             | transposase, IS4                             | 0.59  | 0.52±0.01  |
| 01551 |             | ISPsy4,transposition helper protein          | 0.01  | 0.02±0.05  |
| 00021 |             | transposase                                  | 0.00  |            |
| 00242 |             | transposase                                  | 0.01  |            |
| 02814 | <i>xerC</i> | Integrase                                    | 0.00  | 0.01±0.02  |
| 00541 | <i>bet</i>  | phage recombination protein                  | 3.17  |            |
| 01869 |             | transposase                                  | 3.54  | 4.21±0.03  |
| 00110 | <i>dgc</i>  | diguanylate cyclase                          | 0.20  |            |
| 00426 |             | sensor domain-containing diguanylate cyclase | 0.30  | 0.26±0.05  |
| 00427 |             | hypothetical protein                         | 0.18  |            |
| 02335 | <i>ahpD</i> | alkylhydroperoxidase like protein            | 0.00  | 0.00±0.02  |
| 00222 |             | AmmeMemoRadiSam system protein B             | 17.11 | 18.38±0.07 |
| 00223 |             | AmmeMemoRadiSam system protein A             | 6.06  |            |
| 00044 |             | AmmeMemoRadiSam system radical SAM enzyme    | 3.93  |            |
| 02272 |             | hypothetical protein                         | 0.00  | 0.00±0.03  |
| 02500 |             | hypothetical protein                         | 2.56  | 2.55±0.05  |
| 00918 |             | hypothetical protein                         | 0.57  |            |
| 00983 |             | hypothetical protein                         | 0.61  |            |
| 01197 |             | hypothetical protein                         | 0.39  |            |
| 02267 |             | hypothetical protein                         | 0.28  |            |
| 02455 |             | hypothetical protein                         | 0.35  |            |
| 02933 |             | hypothetical protein                         | 0.26  |            |
| 02478 |             | hypothetical protein                         | 2.14  |            |
| 02502 |             | hypothetical protein                         | 3.83  |            |
| 00045 |             | hypothetical protein                         | 43.06 | 50.47±0.06 |
| 02559 |             | hypothetical protein                         | 0.63  |            |

Fold Change  $\geq 1.5$ , p-value  $\leq 0.05$ : up-regulation; Fold Change  $\leq 0.67$ , p-value  $\leq 0.05$ : down-regulation.

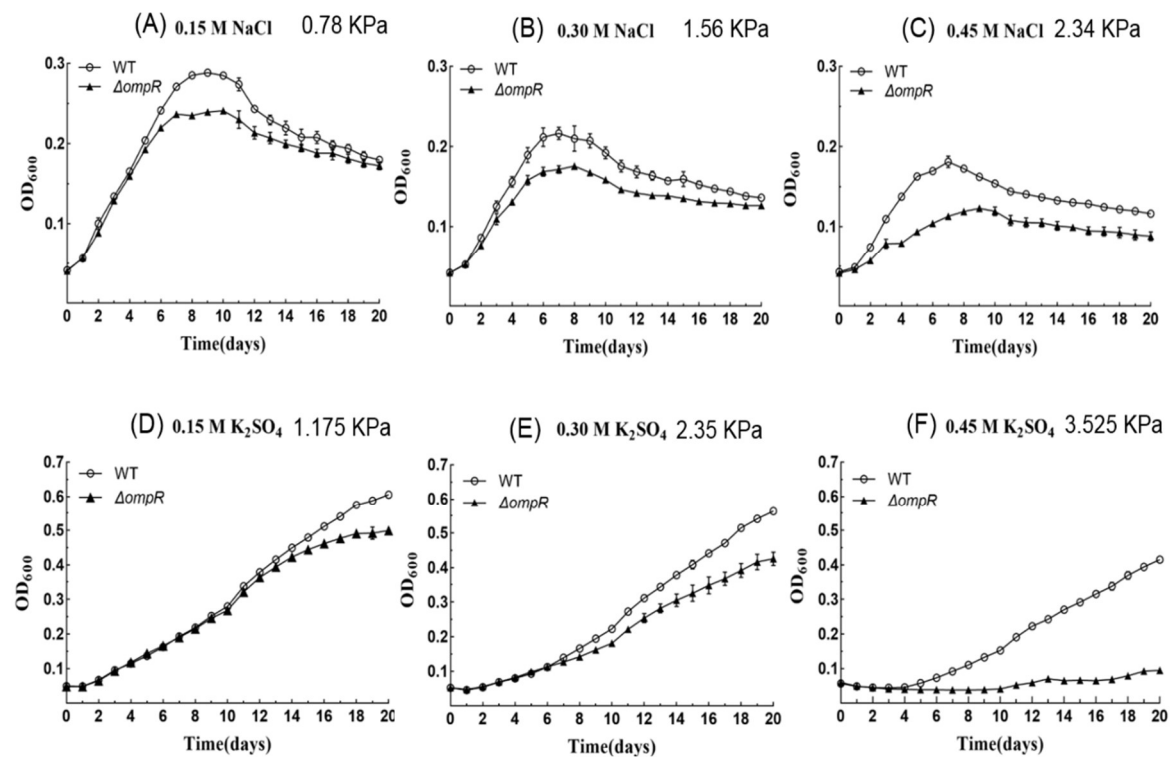

**Figure S1.** Growth analysis of  $\Delta ompR$  and wild-type strains of *A. caldus* at different concentrations of NaCl or  $K_2SO_4$  in  $S^0$  medium.

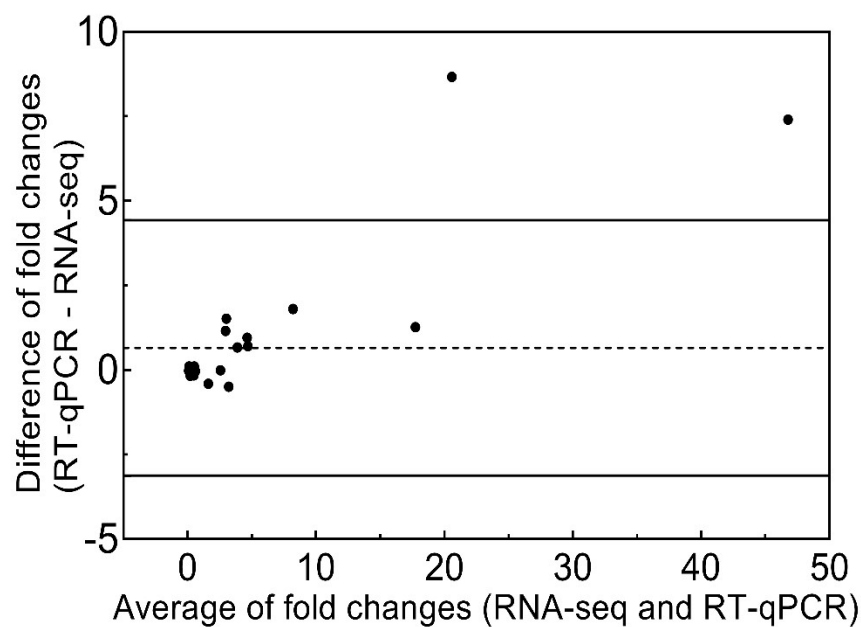

**Figure S2.** Bland-Altman plot of differences against averages of fold changes for RNA-seq and RT-qPCR, with 95% confidence limit (the upper and lower solid lines).
